# Supplementary material
Source: publisher figshare collection journal article supplement (https://tandf.figshare.com/ndownloader/files/36576243)
Supplement: Supplementary file 1 [file 36576243]

**Supporting Information**

Coordination chemistry of silver(I), gold(I) and nickel(II) with bis N‑heterocyclic carbenes: Applications in electrocatalytic hydrogen evolution reaction

GEETHA B. M., ZHOVETA YHOBU, MONICA V., JAN GRZEGORZ MAŁECKI, NAGARAJU D. H.*, MOHAMMAD AZAM, SAUD I. AL–RESAYES and SRINIVASA BUDAGUMPI*

Table S1. Crystallographic data and the structure refinement detail for **2** and **4**.

|  | 2 | 4 |
| --- | --- | --- |
| Formula | C27H36N6Br2 | C54H68Ag2F12N12P2 |
| Formula weight | 604.44 | 1390.88 |
| Temperature (K) | 295(2) | 295(2) |
| Crystal system | Monoclinic | Monoclinic |
| Space group | *P*21/c | *P*21/n |
| Unit cell dimensions |  |  |
| a (Å) | 13.9657(6) | 11.1513(5) |
| b (Å) | 14.8531(5) | 15.9687(8) |
| c (Å) | 15.2903(7) | 17.3867(6) |
| α (°) | 90 | 90 |
| β (°) | 111.452(5) | 95.403(4) |
| γ (°) | 90 | 90 |
| *V* (Å3) | 2952.0(2) | 3082.3(2) |
| Z | 4 | 2 |
| Density (calcd) (g/cm3) | 1.360 | 1.499 |
| Abs. coeff. (mm−1) | 2.771 | 0.769 |
| *F*(000) | 1240.0 | 1416.0 |
| Crystal size (mm) | 0.22×0.10×0.07 | 0.23×0.21×0.07 |
| Radiation (Å) | 0.71073 | 0.71073 |
| θ Min, Max (°) | 6.844, 59.01 | 6.738, 58.716 |
| Data set | –19:14, –20:15, –20:20 | –10:14, –16:21, –23:17 |
| Tot., Uniq. data | 16754 | 14880 |
| R (int) | 0.0390 | 0.0409 |
| Nref, Npar | 7006, 320 | 7319, 374 |
| R, wR2, S | 0.0764, 0.0809, 1.010 | 0.1119, 0.1602, 1.025 |

Table S2. Important bond distances and angles of bromide salt **2**.

| Module | Bond distance (Å) | Module | Bond angle (°) |
| --- | --- | --- | --- |
| N1–N2 | 1.367(3) | N2–N1–C13 | 119.5(2) |
| N1–C1 | 1.311(3) | C1–N1–N2 | 111.0(2) |
| N1–C13 | 1.461(3) | C1–N1–C13 | 129.5(2) |
| N2–C2 | 1.299(4) | C2–N2–N1 | 104.0(2) |
| N3–C1 | 1.329(3) | C1–N3–C2 | 106.2(2) |
| N3–C2 | 1.362(3) | C1–N3–C3 | 126.3(2) |
| N3–C3 | 1.451(3) | C2–N3–C3 | 127.5(2) |
| N4–N5 | 1.368(3) | N5–N4–C15 | 121.7(2) |
| N4–C15 | 1.465(3) | C16–N4–N5 | 111.2(2) |
| N4–C16 | 1.309(3) | C16–N4–C15 | 127.1(2) |
| N5–C17 | 1.298(3) | C17–N5–N4 | 103.8(2) |
| N6–C16 | 1.330(3) | C16–N6–C17 | 105.9(2) |
| N6–C17 | 1.362(3) | C16–N6–C18 | 125.8(2) |
| N6–C18 | 1.454(3) | C17–N6–C18 | 128.2(2) |
| C3–C8 | 1.386(4) | N1–C1–N3 | 107.4(2) |
| C4–C9 | 1.509(4) | N2–C2–N3 | 111.4(2) |
| C8–C11 | 1.499(4) | C4–C3–N3 | 116.9(2) |
| C18–C23 | 1.376(5) | C8–C3–N3 | 118.6(2) |
| C19–C24 | 1.492(5) | N1–C13–C14 | 111.0(2) |
| C23–C26 | 1.519(6) | N4–C15–C14 | 112.4(2) |
| C4–C5 | 1.387(4) | N4–C16–N6 | 107.4(2) |
| C11–C12 | 1.521(4) | N5–C17–N6 | 111.7(2) |
| C20–C21 | 1.339(7) | C19–C18–N6 | 116.5(3) |
| C26–C27 | 1.425(7) | C23–C18–N6 | 118.4(3) |

Table S3. Important bond distances and angles of silver(I) complex **4**.

| Module | Bond distance (Å) | Module | Bond angle (°) |
| --- | --- | --- | --- |
| Ag1–C1 | 2.079(5) | C16–Ag1–C1 | 176.9(2) |
| Ag1–C16 | 2.076(5) | N2–N1–C3 | 118.7(5) |
| N1–N2 | 1.373(7) | C1–N1–N2 | 114.2(5) |
| N1–C1 | 1.326(7) | C1–N1–C13 | 126.9(5) |
| N1–C13 | 1.456(7) | C2–N2–N1 | 102.1(5) |
| N2–C2 | 1.295(9) | C1–N3–C3 | 125.4(4) |
| N3–C1 | 1.355(7) | C2–N3–C1 | 108.0(5) |
| N3–C2 | 1.351(8) | C2–N3–C3 | 126.5(5) |
| N3–C3 | 1.448(7) | N5–N4–C15 | 118.8(5) |
| N4–N5 | 1.371(7) | C16–N4–N5 | 115.0(5) |
| N4–C15 | 1.458(7) | C16–N4–C15 | 126.2(5) |
| N4–C16 | 1.331(7) | C16–N4–C15 | 126.2(5) |
| N5–C17 | 1.302(8) | C17–N5–N4 | 102.3(5) |
| N6–C16 | 1.351(6) | C16–N6–C17 | 109.1(5) |
| N6–C17 | 1.364(8) | C16–N6–C18 | 124.6(5) |
| N6–C18 | 1.448(7) | C17–N6–C18 | 126.3(5) |
| C3–C8 | 1.370(9) | N1–C1–Ag1 | 129.0(4) |
| C4–C11 | 1.533(12) | N3–C1–N1 | 103.2(4) |
| C13–C14 | 1.515(9) | N3–C1–Ag1 | 127.8(4) |
| C14–C15 | 1.468(9) | N2–C2–N3 | 112.5(6) |
| C18–C19 | 1.369(10) | C4–C3–N3 | 116.8(6) |
| C18–C23 | 1.351(10) | C8–C3–N3 | 120.4(6) |
| C19–C20 | 1.372(11) | N1–C13–C14 | 112.4(6) |
| C19–C24 | 1.496(13) | N4–C15–C14 | 112.2(6) |
| C20–C21 | 1.373(15) | N4–C16–Ag1 | 128.1(4) |
| C21–C22 | 1.316(16) | N4–C16–N6 | 102.3(4) |
| C22–C23 | 1.411(13) | N6–C16–Ag1 | 129.5(4) |
| C23–C26 | 1.602(18) | N5–C17–N6 | 111.2(5) |
| C24–C25 | 1.421(18) | C19–C18–N6 | 118.8(6) |
| C26–C27 | 1.331(16) | C23–C18–N6 | 120.0(7) |

Table S4. EEC parameters obtained from the Nyquist plot at the overpotentials of the electrodes.

| Electrode | *R*s/Ω cm2 | CPEdl/μF cm-2 | *R*ct/Ω cm2 | CPEp/μF cm-2 | *R*p/Ω cm2 |
| --- | --- | --- | --- | --- | --- |
| **4** | 16.1 | 0.31 | 5.162 | 2.01 | 51.6 |
| **5** | 28.96 | 0.08 | 41.21 | 0.87 | 10.43 |
| **6** | 26.69 | 1.64 | 79.9 | 5.23 | 50.24 |
| **4-MWCNT** | 17.84 | 1.74 | 8.53 | 35.51 | 21.59 |
| **5-MWCNT** | 16.98 | 0.31 | 15.49 | 0.91 | 25.42 |
| **6-MWCNT** | 21.15 | 0.85 | 5.418 | 29.8 | 44.12 |

Figure S1. 1H-NMR spectra of triazolium salt **3**.

Figure S2. 13C-NMR spectra of triazolium salt **3**.

Figure S3. 1H-NMR spectra of disilver(I) complex **4**.

Figure S4. 13C-NMR Spectra of disilver(I) complex **4**.

Figure S5. 1H-NMR spectra of digold(I) complex **5**.

Figure S6. 13C-NMR spectra of digold(I) complex **5.**

Figure S7. 1H-NMR spectra of nickel(II) salt **6** substituted with propyl spacer and 2,6–diethyl–4–H–1,2,4–triazole.

Figure S8. FT-IR spectrum of the salt and its corresponding Ag(I) and Au(I) complexes and the nickel coordinated salt.





Figure S9. Nyquist plot of complex **5** and its MWCNT composite at their respective overpotentials.
